# Supplementary material
Source: PubMed Central journal article supplement (PMC4414694)

Fig. 1

```
-----MKIAVIGQSLFGQEVYCHLR-KEGHEVVGVTVPDKD 36 human 1L1
-----MKIAVIGQSLFGQEVYKELK-NEGHMIVGVFTIPDKD 36 zebra fish 1L1
-----MKIAIIGQSLFGLEVYKEVK-KAGHEIVGIFTIPDKD 36 shark 1L1
-----MKIAVIGQSVFGAEVFRLLR-RNGHEIVGVFTIPDAN 36 sea hare 1L1
-----MKIAVIGQSMFGADTYNILR-KNGHKVVGVTIPDVG 36 sea squirt 1L1a
-----MKIAIIGQSAFGVDVYKELR-KNGHEIVVFTIPDKN 36 elegans 1L1
-----MPPVAVPEEPSKKKLRVAIIGQSTFAAEVFKLLQ-RDGHEVVGVTVLDKG 50 butterfly 1L1
-----MAQLKVAIIGQSNFAAEVYKLLK-LNGHQITGVFTIPDKG 39 honey bee 1L1
-----MALKMRIAIIIGQSNFAADVLELLLDRSNIQIVGVFTIPDKG 41 fruit fly 1L1
-MLRRGSQALRRFSTGRVYFKNKLLKALIGQSLFGQEVYSHLR-KEGHRVVGVTVPDKD 58 human 1L2
-MLRAAPRLLRTFCTSSAAVQHKLKALIGQSIFGQEVYNKLR-KEGHKVVGVFTVPDKN 58 chicken 1L2
-MLWTANTIMRKFSSSSVYYQNKLKALIGQSLFGQEVYTNLR-KQGHKVVGVFTVPDKD 58 zebra fish 1L2
-MLWAANQFIRKLSTSTVYYQNKLRLALIGQSLFGQEVYNNLR-KEGHKVVGVFTVPDRE 58 shark 1L2
MMWRAALIPKRLFATSQEYWANKMKIAVIGQSMFGADTYNILR-KNGHKVVGVTIPDVG 59 sea squirt 1L1b
::*:*** * . : . : : ** : *
```

Fig. 2

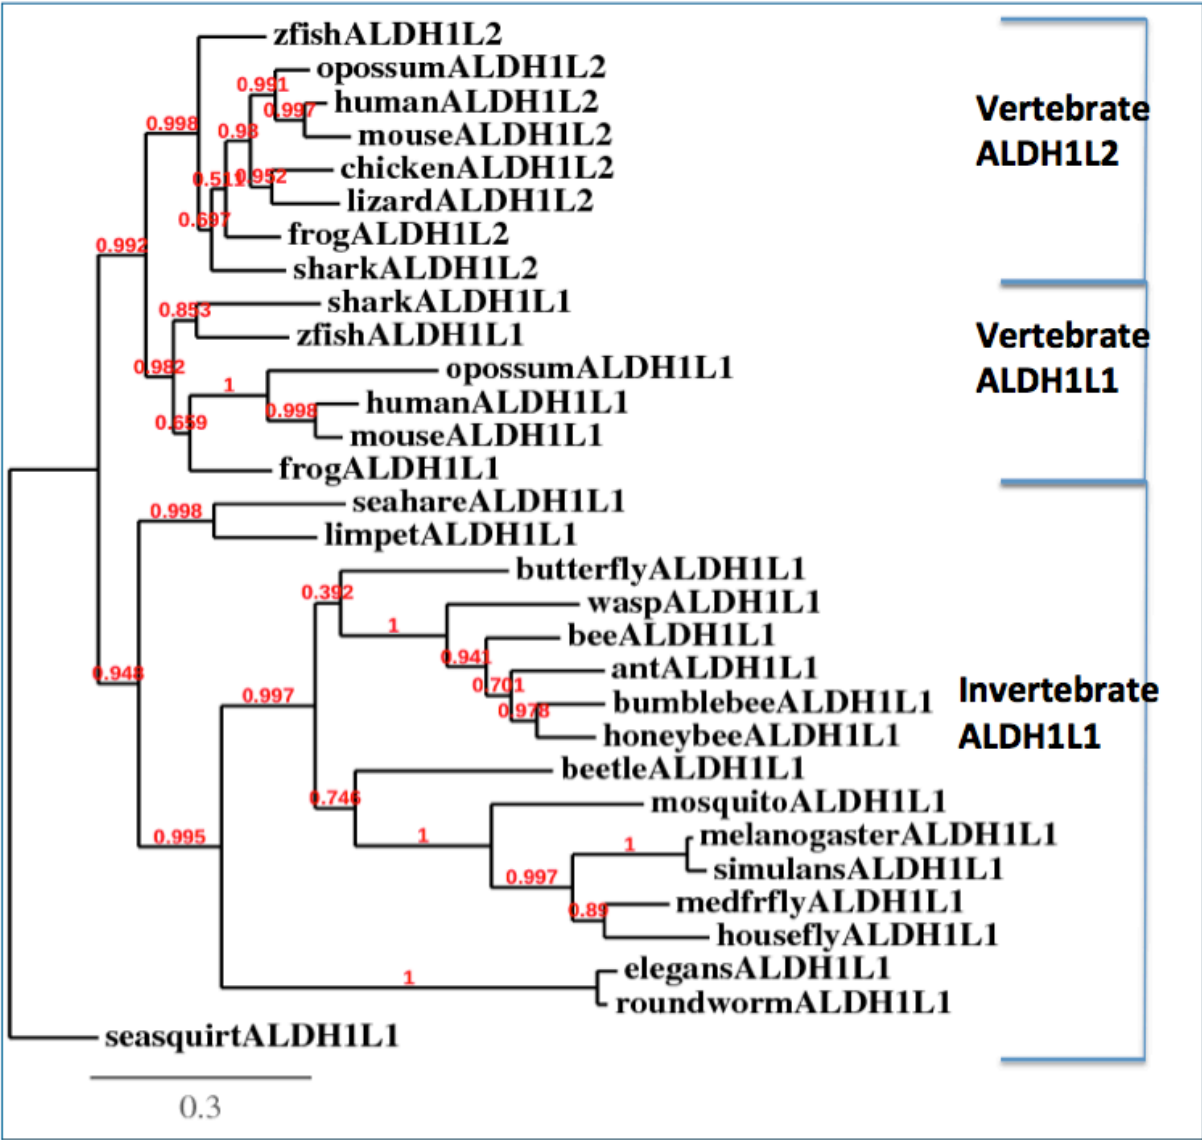

Fig. 3

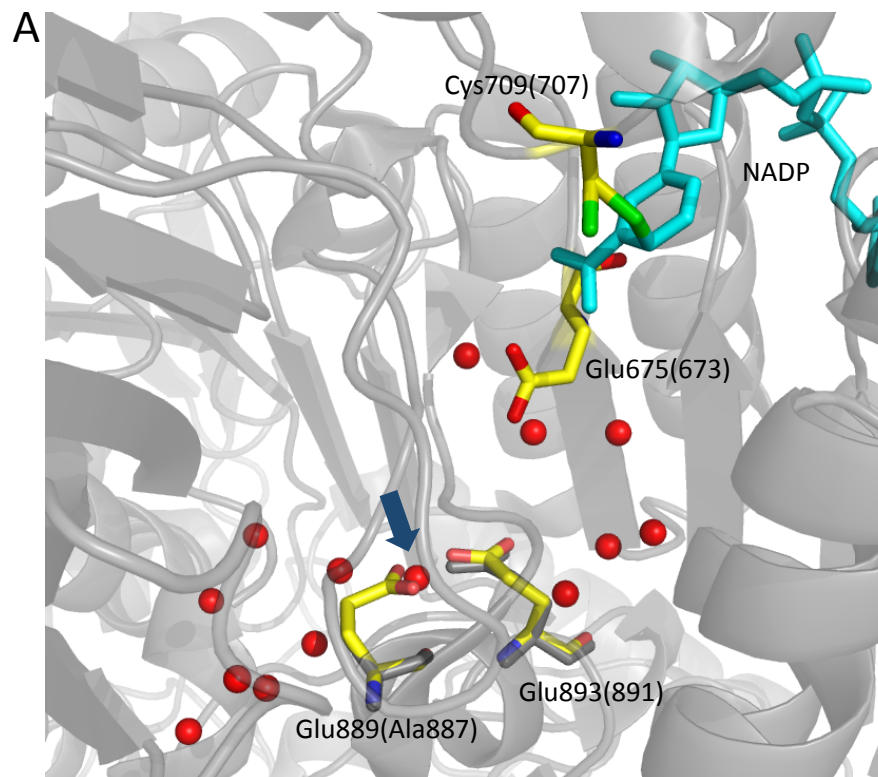

**B**

|                  |                                      |     |
|------------------|--------------------------------------|-----|
| humanALDH1L1     | KQSGFGKDLGE <b>A</b> ALNEYLRVKTVTFEY | 902 |
| rataALDH1L1      | KQSGFGKDLGE <b>A</b> ALNEYLRIKTVTFEY | 902 |
| mouseALDH1L1     | KQSGFGKDLGE <b>A</b> ALNEYLRIKTVTFEY | 902 |
| frogALDH1L1      | KQSGFGKDLGE <b>E</b> ALNEYLKTKAVTIEY | 902 |
| zfishALDH1L1     | KQSGFGKDLG <b>Q</b> EALNEYLKTKCVTVEY | 904 |
| seasquirtALDH1L1 | KQSGFGKDLGE <b>D</b> ALNEYLKTKAVTLEY | 898 |
| humanALDH1L2     | KQSGFGKDLGE <b>E</b> ALNEYLKTKVTLEY  | 923 |
| mouseALDH1L2     | KQSGFGKDLGE <b>E</b> ALNEYLKIKTVTLEY | 923 |
| frogALDH1L2      | KQSGFGKDLGE <b>E</b> ALHEYLRTKAVTVEY | 922 |
| zfishALDH1L2     | KQSGFGKDLGE <b>D</b> ALHEYLRTKAVTVEY | 923 |
|                  | *****: *.**.*: * **.*                |     |

Fig. 4

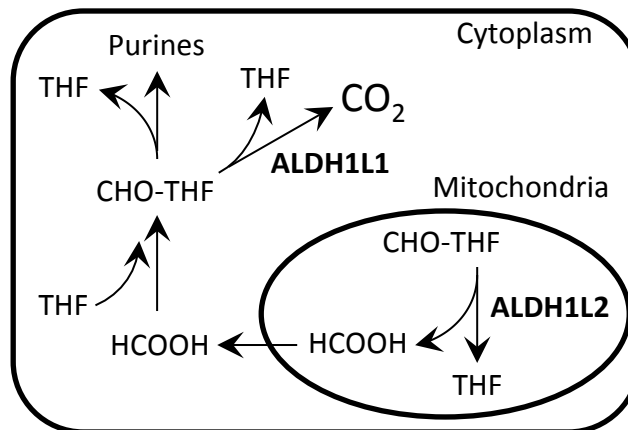

Fig. 5

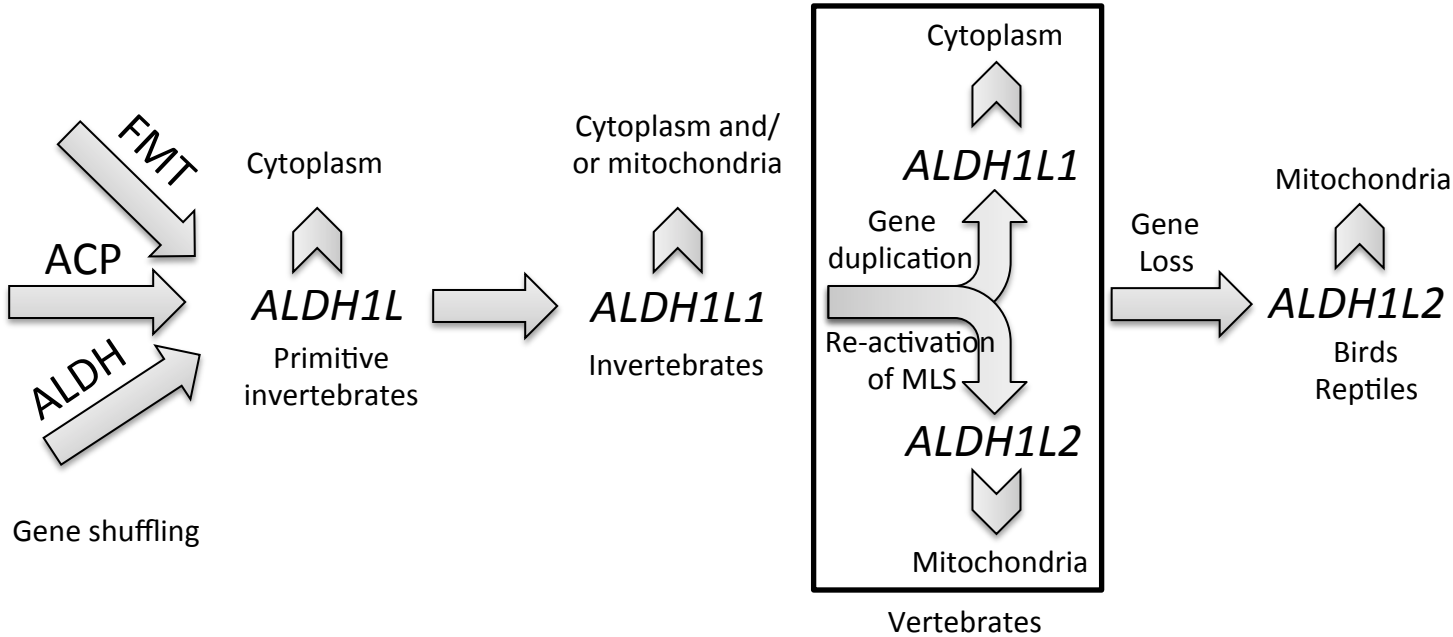

Supplement: NIHMS652084-supplement.pdf [file NIHMS652084-supplement.pdf]
